# Supplementary material for: The Oncogenic Role of COL23A1 in Clear Cell Renal Cell Carcinoma
Source: PubMed Central journal article supplement (PMC5575106; doi:10.1038/s41598-017-10134-2), 2017-08-29
Supplement: 41598_2017_10134_MOESM1_ESM.pdf [file 41598_2017_10134_MOESM1_ESM.pdf]

## **Title: The Oncogenic Role of COL23A1 in Clear Cell Renal Cell Carcinoma**

Fujiang Xu <sup>1\*</sup>, Kun Chang<sup>2\*</sup>, Jian Ma<sup>2</sup>, Yuanyuan Qu<sup>2</sup>, Huyang Xie<sup>2</sup>, Bo Dai<sup>2</sup>, Hualei Gan<sup>3</sup>, Hailiang Zhang<sup>2</sup>, Guohai Shi<sup>2</sup>, Yao Zhu<sup>2</sup>, Yiping Zhu<sup>2</sup> Yijun Shen<sup>2</sup>, Dingwei Ye<sup>4</sup>

<sup>1</sup> Department of Urology, Fudan University Shanghai Cancer Center, Institutes of Biomedical Sciences, Fudan University, Shanghai, 200032, China.

<sup>2</sup> Department of Urology, Fudan University Shanghai Cancer Center, Department of Oncology, Shanghai Medical College, Fudan University, Shanghai, 200032, China.

<sup>3</sup> Department of Pathology, Fudan University Shanghai Cancer Center, Department of Oncology, Shanghai Medical College, Fudan University, Shanghai, 200032, China.

<sup>4</sup> Department of Urology, Fudan University Shanghai Cancer Center, Institutes of Biomedical Sciences, Department of Oncology, Shanghai Medical College, Fudan University, Shanghai, 200032, China.

\* These authors contributed equally to this work.

Correspondence and requests for materials should be addressed to D.Y.  
(email: dwyeli@163.com)

Supplementary materials for Fig. 1C:

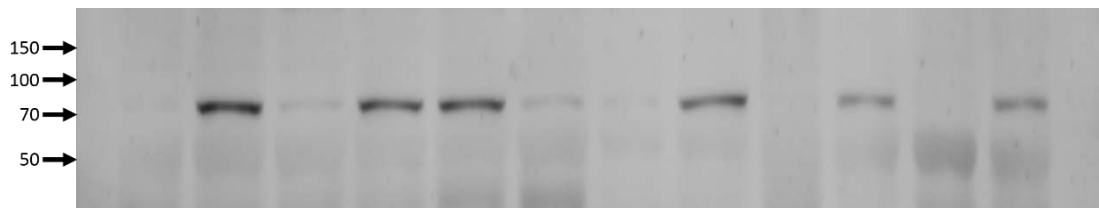

Detecting COL23A1 of ccRCC patients' (1~6) tissues by Western Blot

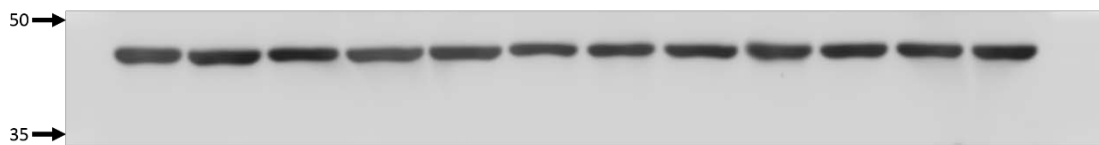

Detecting endogenous control ( $\beta$ -actin) of ccRCC patients' (1~6) tissues by Western Blot

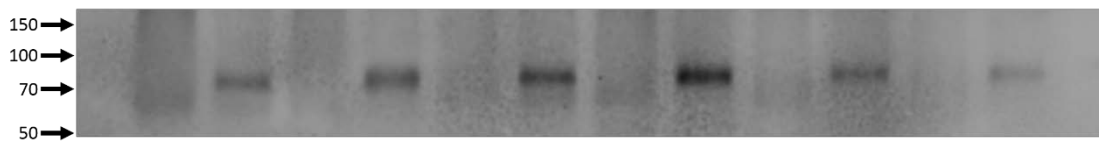

Detecting COL23A1 of ccRCC patients' (7~12) tissues by Western Blot

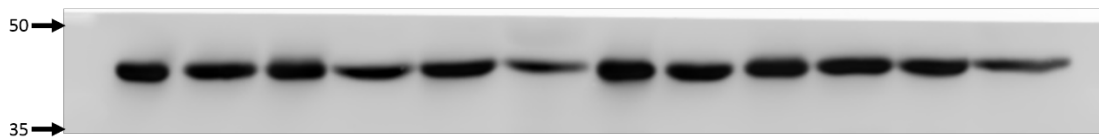

Detecting endogenous control ( $\beta$ -actin) of ccRCC patients' (7~12) tissues by Western Blot

Supplementary materials for Fig. 3B:

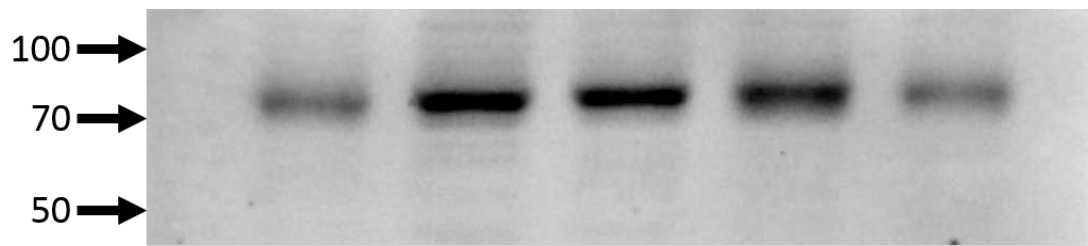

COL23A1 expression in one normal and four ccRCC cell lines

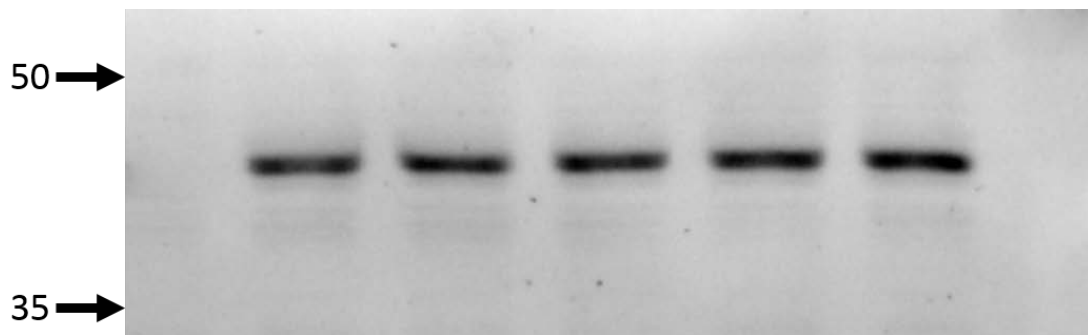

Expression of endogenous control ( $\beta$ -actin) in one normal and four ccRCC cell lines

Supplementary materials for Fig. 4C:

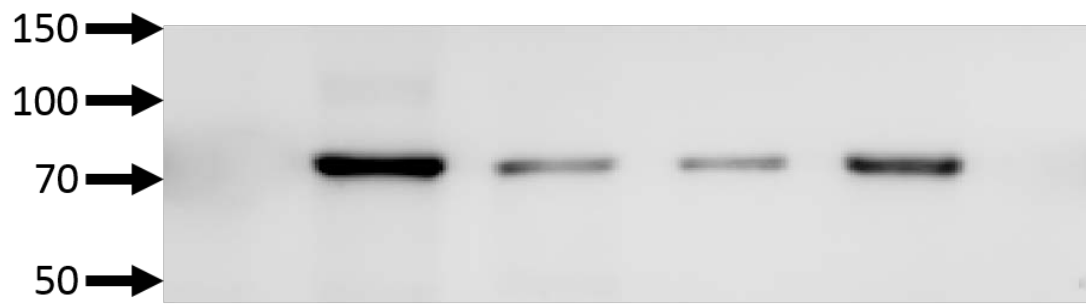

Detecting the efficiency of COL23A1 knockdown by small interfering RNA in 786-O

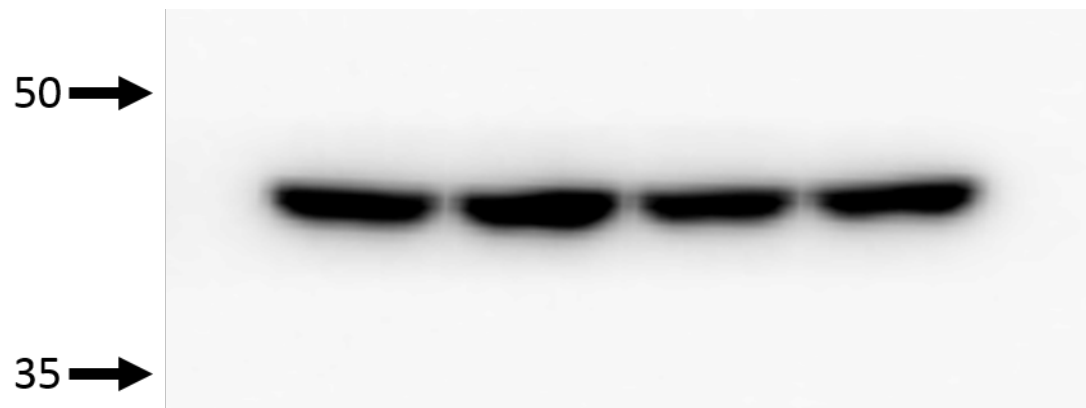

Expression of endogenous control ( $\beta$ -actin) in cell lines detecting the efficiency of COL23A1 knockdown in 786-O

Supplementary materials for Fig. 4D:

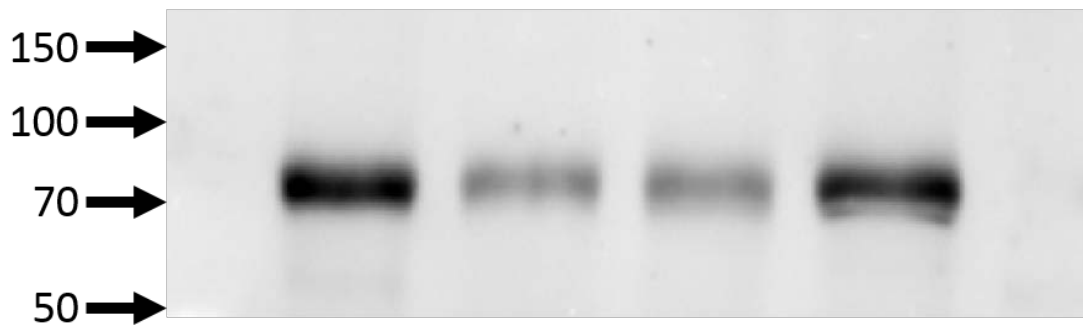

Detecting the efficiency of COL23A1 knockdown by small interfering RNA in A-498

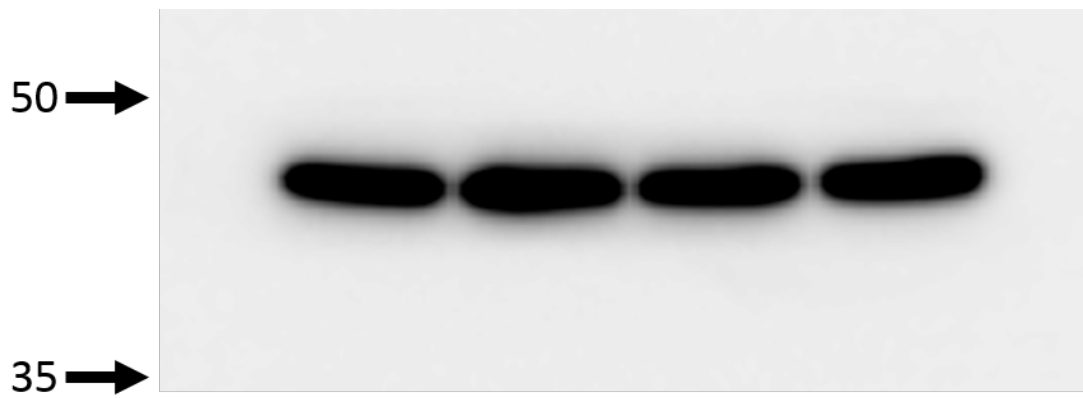

Expression of endogenous control ( $\beta$ -actin) in cell lines detecting the efficiency of COL23A1 knockdown in A-498

Supplementary materials for Fig. 6C:

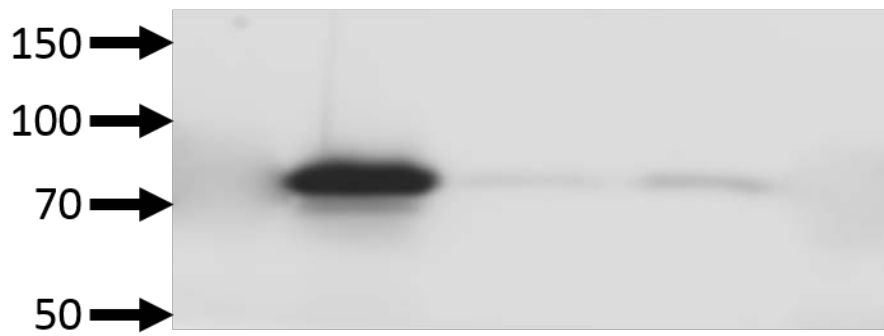

COL23A1 expression in 786-O (siNC, siRNA#1 and siRNA#2)

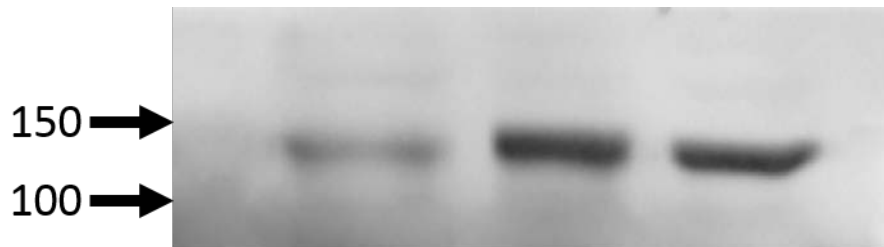

E-cadherin expression in 786-O (siNC, siRNA#1 and siRNA#2)

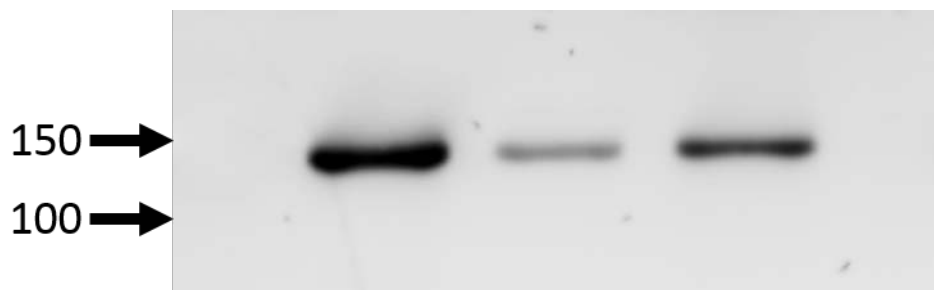

N-cadherin expression in 786-O (siNC, siRNA#1 and siRNA#2)

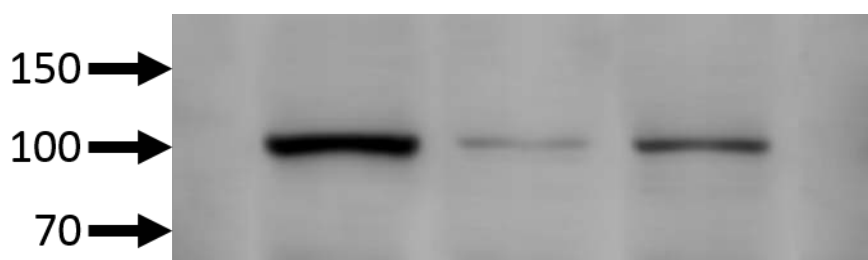

$\alpha$ -catenin expression in 786-O (siNC, siRNA#1 and siRNA#2)

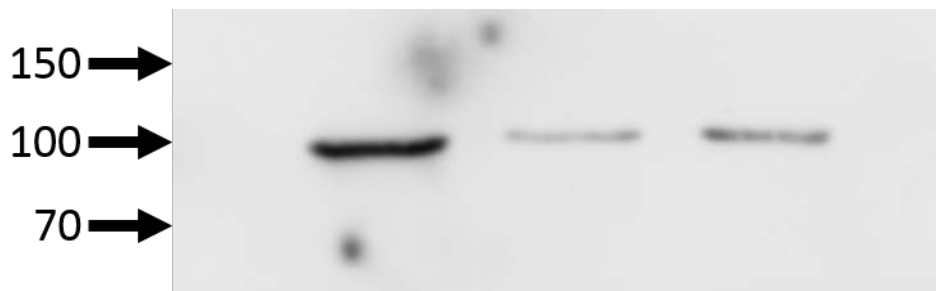

$\beta$ -catenin expression in 786-O (siNC, siRNA#1 and siRNA#2)

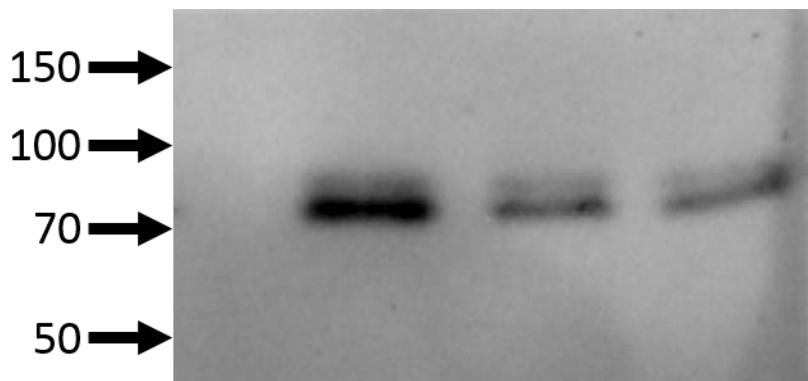

$\gamma$ -catenin expression in 786-O (siNC, siRNA#1 and siRNA#2)

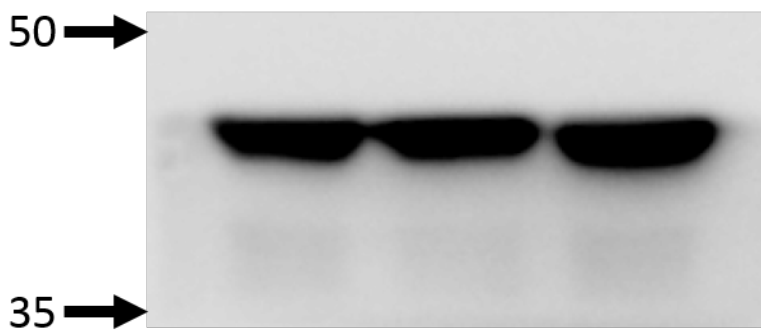

Expression of endogenous control ( $\beta$ -actin) in 786-O (siNC, siRNA#1 and siRNA#2)

Supplementary materials for Fig. 6D:

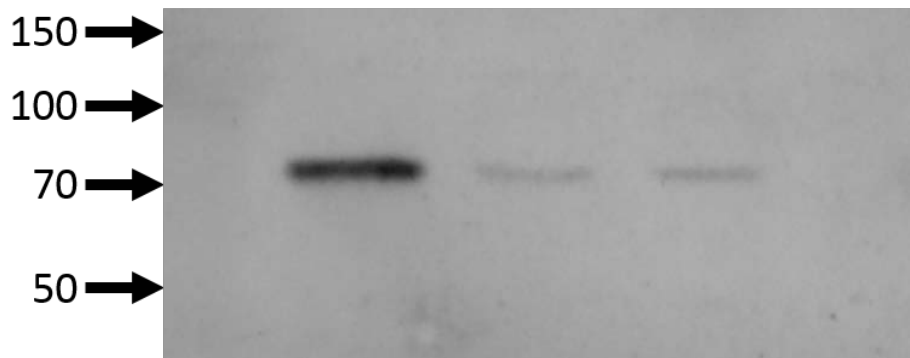

COL23A1 expression in A-498 (siNC, siRNA#1 and siRNA#2)

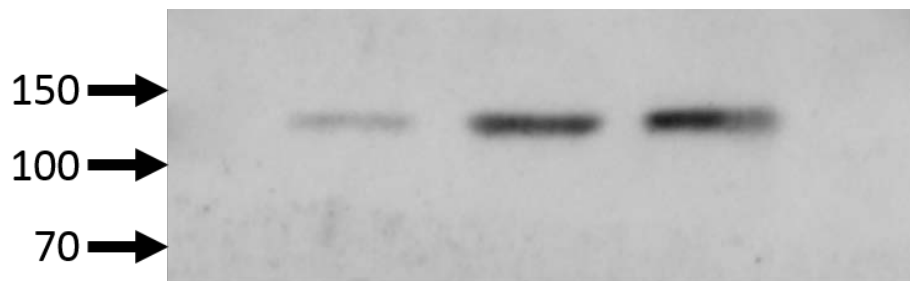

E-cadherin expression in A-498 (siNC, siRNA#1 and siRNA#2)

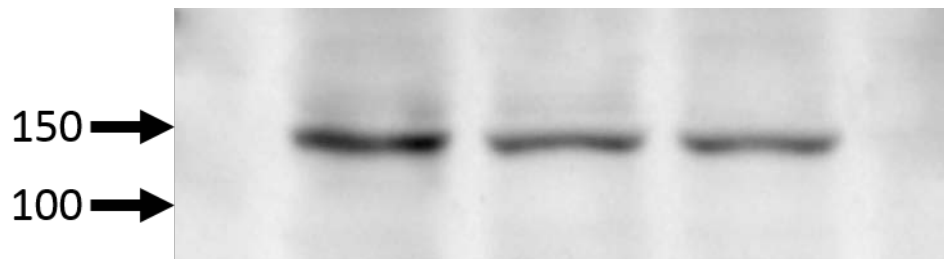

N-cadherin expression in A-498 (siNC, siRNA#1 and siRNA#2)

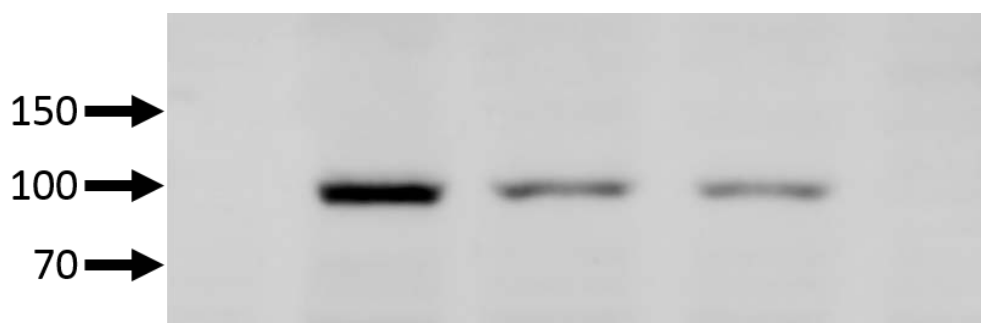

$\alpha$ -catenin expression in A-498 (siNC, siRNA#1 and siRNA#2)



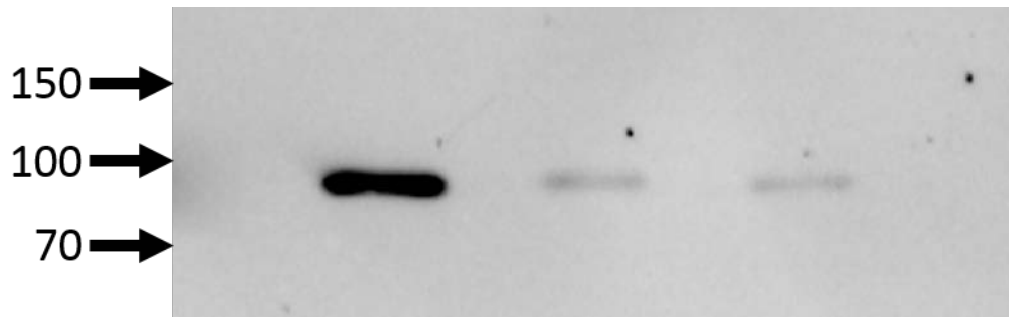

$\beta$ -catenin expression in A-498 (siNC, siRNA#1 and siRNA#2)

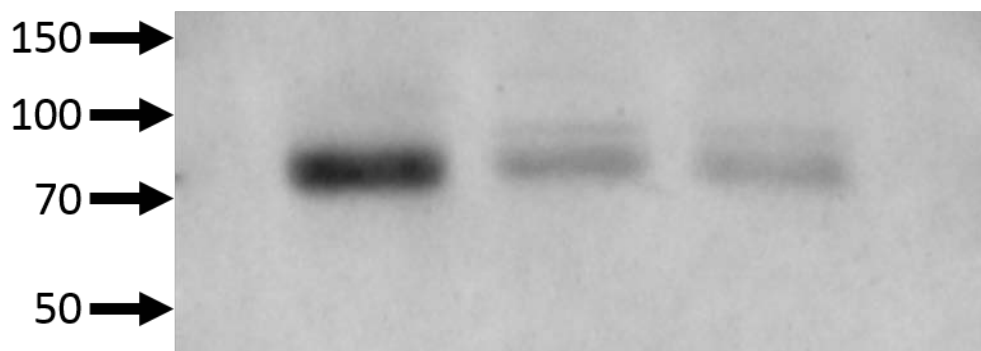

$\gamma$ -catenin expression in A-498 (siNC, siRNA#1 and siRNA#2)

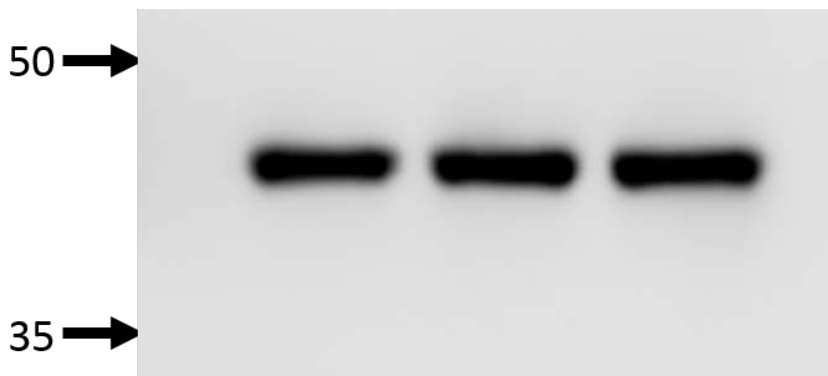

Expression of endogenous control ( $\beta$ -actin) in A-498 (siNC, siRNA#1 and siRNA#2)
